# Supplementary material
Source: Springer Nature journal article supplement (https://www.springermedizin.de/resource/supplementary/12936_2008_737_MOESM5_ESM.pdf/9548124)

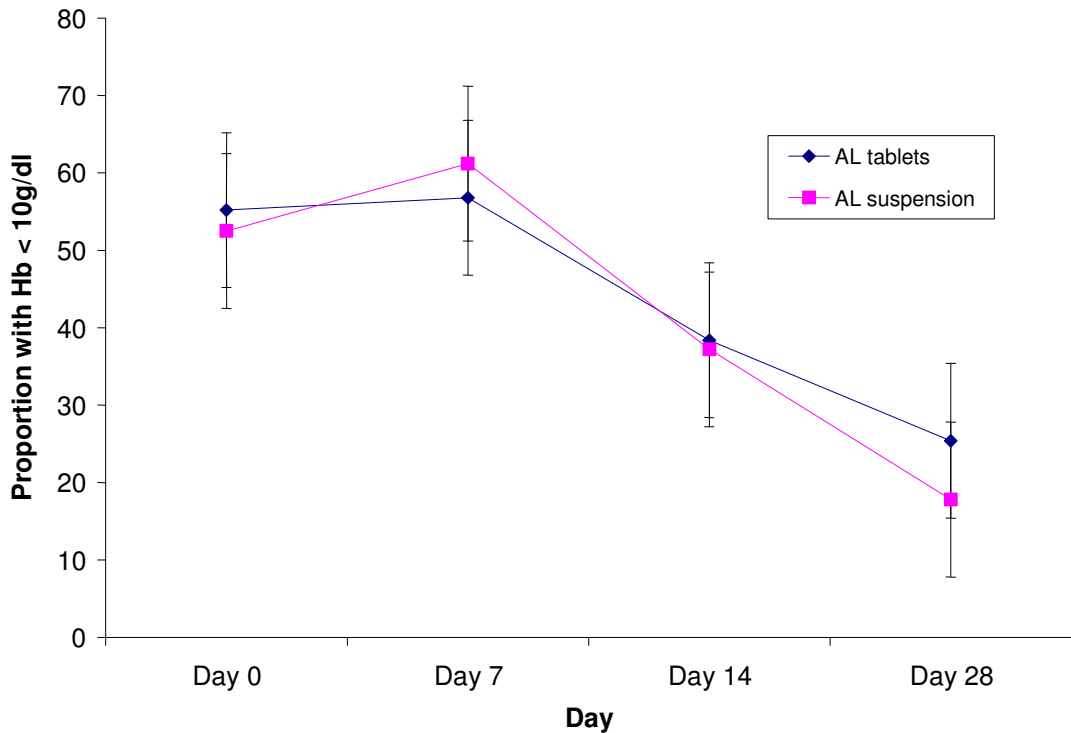

Figure 4: Proportion of children with parasites during the first 3 days of treatment

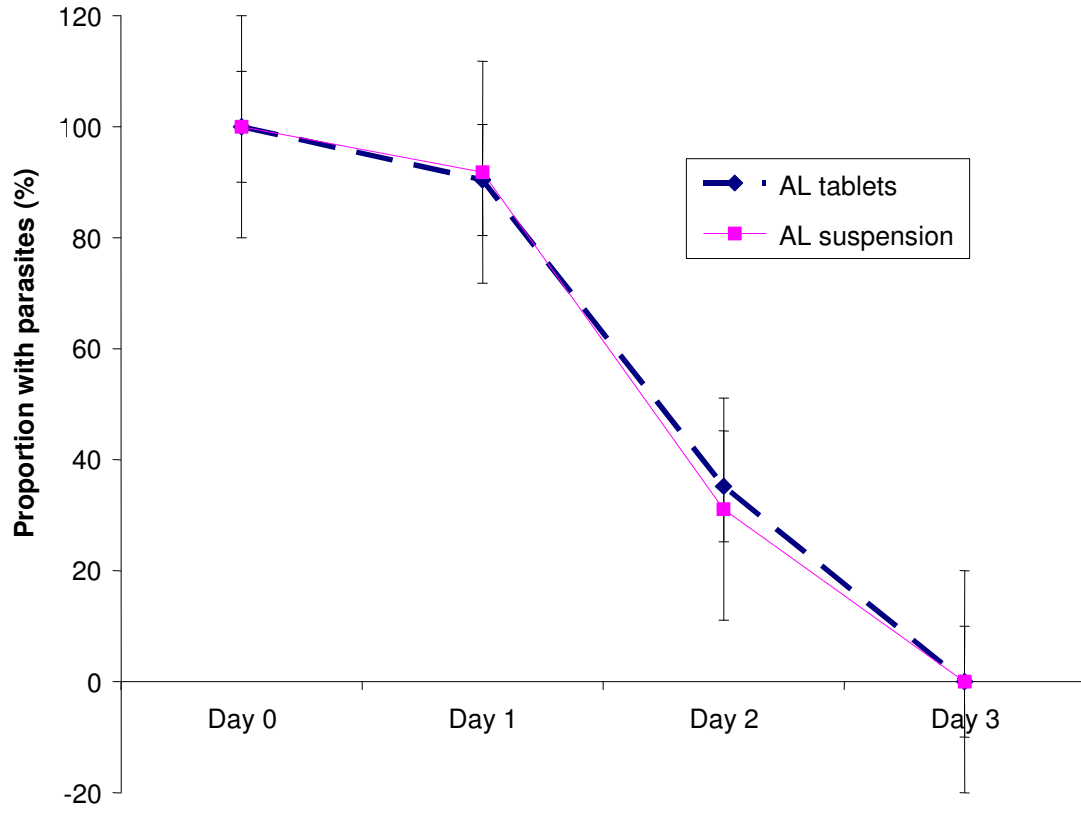

Supplement: MOESM5 [file 9548124]
